# Supplementary material
Source: HighWire-hosted journal article supplement (https://erj.ersjournals.com/content/56/3/2002961)
Supplement: inline-supplementary-material-1 [file inline-supplementary-material-1.pdf]

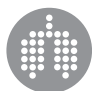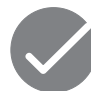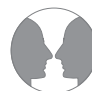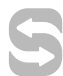

SHAREABLE PDF

Rong-Hui Du<sup>1,3</sup>, Li-Rong Liang<sup>2,3</sup>, Cheng-Qing Yang<sup>1,3</sup>, Wen Wang<sup>2,3</sup>, Tan-Ze Cao<sup>1</sup>, Ming Li<sup>1</sup>, Guang-Yun Guo<sup>1</sup>, Juan Du<sup>1</sup>, Chun-Lan Zheng<sup>1</sup>, Qi Zhu<sup>1</sup>, Ming Hu<sup>1</sup>, Xu-Yan Li<sup>2</sup>, Peng Peng<sup>1,4</sup> and Huan-Zhong Shi <sup>2,4</sup>

**Affiliations:** <sup>1</sup>Dept of Respiratory and Critical Care Medicine, Wuhan Pulmonary Hospital, Wuhan, China. <sup>2</sup>Dept of Respiratory and Critical Care Medicine, Beijing Chao-Yang Hospital, Capital Medical University, Beijing, China. <sup>3</sup>These authors contributed equally. <sup>4</sup>These authors are joint principal authors.

**Correspondence:** Huan-Zhong Shi, Dept of Respiratory and Critical Care Medicine, Beijing Chao-Yang Hospital, Capital Medical University, 8 Gongti Nanlu, Chao-Yang District, Beijing 100020, China. E-mail: shihuanzhong@sina.com

@ERSpublications

**Author response to the correspondence regarding “Predictors of mortality for patients with COVID-19 pneumonia caused by SARS-CoV-2: a prospective cohort study”** <https://bit.ly/31X8cal>

**Cite this article as:** Du R-H, Liang L-R, Yang C-Q, *et al.* Predictors of mortality for patients with COVID-19 pneumonia caused by SARS-CoV-2. *Eur Respir J* 2020; 56: 2002961 [<https://doi.org/10.1183/13993003.02961-2020>].

This single-page version can be shared freely online.

*From the authors:*

We appreciate the thoughtful comments of H-J. Yang and co-workers in their correspondence addressing the predictors of mortality for patients with coronavirus disease 2019 (COVID-19) pneumonia caused by severe acute respiratory syndrome coronavirus 2 (SARS-CoV-2). Their comments are very helpful to improve the expression and increase the quality of our paper [1].
